# Supplementary material for: Towards a re-emergence of chloroquine sensitivity in Côte d’Ivoire?
Source: Malar J. 2018 Nov 7;17:413. doi: 10.1186/s12936-018-2551-7 (PMC6223040; doi:10.1186/s12936-018-2551-7)
Supplement: Supplementary file 1 — Additional file 1: Data on sampling sites and on subjects included in the study. [file 12936_2018_2551_MOESM1_ESM.xls]

## Sheet: Synoptique#1
Sites	Date	Code	age	sex	weight	Residence	ATCD	Prév	TDR	GE	Frottis	DP	crt-Sg
Anonk	2015-02-12	ANK05	9	F		Bocabo	N	N	P	P	Pf	90000	1
Anonk	2015-02-12	ANK07	7	M	25	ANK	O	N	P	P	Pf	20000	1
Anonk	2015-02-12	ANK10	11	F	31	PK18	N	N	P	P	Pf	76000	1
Anonk	2015-02-12	ANK11	7	M	27	ANK	N	N	P	P	Pf	4500	1
Anonk	2015-02-12	ANK13	7	M	28	Avocatier	N	O	P	P	Pf	20000	1
Anonk	2015-02-12	ANK14	2	M	7	PK18	N	N	P	P	Pf	11000	1
Anonk	2015-02-12	ANK23	11	F	31	ANK	N	N	P	P	Pf	2200	1
Anonk	2015-02-12	ANK24				ANK	N	N	P	P	Pf	13000	1
Anonk	2015-02-12	ANK26	5	F	16	Azaguié	N	N	P	P	Pf	20000	1
Anonk	2015-02-12	ANK35	9	F	23	ANK	N	O	P	P	Pf	20000	1
Anonk	2015-02-12	ANK36	14	F	31	Avocatier	O	O	P	P	Pf	4800	1
Anonk	2015-02-12	ANK41	22	F		ANK	N	N	P	P	Pf	2800	0
Anonk	2015-02-12	ANK43	6	M	18	PK18	N	N	P	P	Pf	40000	1
Anonk	2015-02-12	ANK44	15	M	38	ANK	N	N	P	P	Pf	80000	1
Anonk	2015-02-12	ANK47	13	F	33	Adjamé	O	N	P	P	Pf	20000	1
Anonk	2015-02-12	ANK51	53	F	76	Ndotré	N	N	P	P	Pf	5300	0
Anonk	2015-02-12	ANK56	45	F	76	Abobo Gare	N	N	P	P	Pf	2500	1
Anonk	2015-03-02	ANK57	7	M	32	ANK	N	O	P	P	Pf	6200	0
Anonk	2015-03-02	ANK63	3	M	14	PK18	N	O	P	P	Pf	30000	1
Anonk	2015-03-02	ANK64	3	F	13	PK18	N	O	P	P	Pf	45000	1
Anonk	2015-03-02	ANK66	5	F	13	Abobo Gare	N	O	P	P	Pf	15000	1
Anonk	2015-03-02	ANK70	44	F	83	Ndotré	N	N	P	P	Pf	8500	0
Anonk	2015-03-02	ANK74	10	M	31	Anyama	N	N	P	P	Pf	4800	1
Anonk	2015-03-10	ANK75	34	F	57	ANK	N	N	P	P	Pf	6000	1
Anonk	2015-03-10	ANK78	25	M	65	PK18	N	N	P	P	pf	4800	1
Anonk	2015-03-16	ANK80	20	F	66	ANK	N	N	P	P	Pf	24000	1
Anonk	2015-03-16	ANK81	40	F	75	ANK	N	N	P	P	Pf	18000	1
Anonk	2015-03-16	ANK84	13	F	31	ANK	N	N	P	P	Pf	19000	1
Anonk	2015-03-16	ANK86	37	M	58	PK18	N	N	P	P	Pf	8600	0
Anonk	2015-03-16	ANK93	8	F	26	Anyama	N	N	P	P	Pf	42000	NP
Anonk	2015-03-16	ANK102	13	M	35	Anador	N	N	P	P	Pf	50000	NP
Ayame	2015-06-19	AY003	20	F	66	Diby	Grossesse	N	P	P	Pf	5840	1
Ayame	2015-06-19	AY005	8	M	18	Kelesso	N	N	P	P	Pf	162000	1
Ayame	2015-06-22	AY006	21	F	58	Eboué	N	N	P	P	Pf	5000	1
Ayame	2015-06-22	AY007	11	F	31	Ayamé	N	N	P	P	Pf	6830	1
Ayame	2015-06-22	AY010	2	M	11	Bonoua	N	N	P	P	Pf	8480	1
Ayame	2015-06-25	AY011	25	F	93	Ayamé	N	N	P	P	Pf	11000	1
Ayame	2015-06-26	AY012	38	F	54	Akressi	Grossesse	N	P	P	Pf	35000	1
Ayame	2015-06-26	AY013	2	M	13	Ayamé	N	N	P	P	Pf	20000	0
Ayame	2015-06-26	AY014	44	M	70	Aboisso	N	N	P	P	Pf	28000	1
Ayame	2015-06-26	AY015	12	F	31	Ayamé	N	N	P	P	Pf	10000	1
Ayame	2015-06-26	AY017	15	F	48	Ayamé	N	N	P	P	Pf	2060	1
Ayame	2015-07-01	AY018	4	F	10	Ayamé	N	N	P	P	Pf	37000	1
Ayame	2015-07-01	AY020	3	M	19.5	Ayamé	N	N	P	P	Pf	17310	1
Ayame	2015-07-01	AY021	3	M	12	Ayamé	N	N	P	P	Pf	9045	1
Ayame	2015-07-01	AY022	9	M	26.5	Ayamé	N	N	P	P	Pf	18992	1
Ayame	2015-07-02	AY024	5	F	18	Appouasso	N	N	P	P	Pf	200000	1
Ayame	2015-07-02	AY025	45	M	80	Aboisso	N	N	P	P	Pf	2500	1
Ayame	2015-07-02	AY027	3	M	10	Amoakro	N	N	P	P	Pf	2330	1
Ayame	2015-07-02	AY028	55	F	64	Ayamé	N	N	P	P	Pf	2060	1
Ayame	2015-07-06	AY029	2	M	12	Assouba	N	N	P	P	Pf	15000	1
Ayame	2015-07-07	AY030	9	F	21	Ayebo	N	N	P	P	Pf	200000	1
Ayame	2015-07-07	AY031	33	F	66	Ayamé	N	N	P	P	Pf	7327	1
Ayame	2015-07-08	AY033	10	F	22	Ayamé	N	N	P	P	Pf	123000	1
Ayame	2015-07-08	AY034	6	F	18	Ayamé	N	N	P	P	Pf	116000	1
Ayame	2015-07-15	AY035	39	F	66	Ayamé	N	N	P	P	Pf	32450	0
Ayame	2015-07-20	AY036	12	F	22	Ayamé	N	N	P	P	Pf	120000	1
Ayame	2015-07-20	AY042	20	F	53	Ayamé	N	N	P	P	Pf	68000	1
Ayame	2015-07-20	AY044	3	F	15	Ayamé	N	N	P	P	Pf	15000	1
Ayame	2015-07-20	AY046	7	M	22	Ayamé	N	N	P	P	Pf	10000	1
Ayame	2015-07-20	AY047	7	M	21	Akakro	N	N	P	P	Pf	20000	1
Ayame	2015-07-20	AY048	18	F	55	Ayamé	N	N	P	P	Pf	1642
Port-Bouet	2015-03-16	PB002	22	F	56	Kmssi	N	N	P	P	Pf	12800	1
Port-Bouet	2015-03-16	PB004	18	F	47.5	Vridi	N	N	P	P	Pf	8900	1
Port-Bouet	2015-03-16	PB006	4	F	18	PB	N	N	P	P	Pf	8400	0
Port-Bouet	2015-03-16	PB009	5	F	14	PB	N	N	P	P	Pf	2100	0
Port-Bouet	2015-03-16	PB012	27	F	66	PB	N	N	P	P	Pf	25800	0
Port-Bouet	2015-03-16	PB015	33	M	69	Kmssi	N	N	P	P	Pf	35000	1
Port-Bouet	2015-03-16	PB016	15	M	42	PB	N	N	P	P	Pf	6800	1
Port-Bouet	2015-05-01	PB017	29	F	65	PB	N	N	P	P	Pf	8200	1
Port-Bouet	2015-05-01	PB019	7	M	19	Modeste	N	N	P	P	Pf	2100	1
Port-Bouet	2015-05-01	PB020	18	M	55	PB	N	N	P	P	Pf	6800	1
Port-Bouet	2015-05-01	PB021	7	M	22	Gonzaqueville	N	N	P	P	Pf	1200	0
Port-Bouet	2015-05-04	PB022	27	F	50	PB	N	N	P	P	Pf	2100	0
Port-Bouet	2015-05-11	PB023	54	F	75	PB	N	N	P	P	Pf	1200	0
Port-Bouet	2015-05-11	PB024	3	M	11	PB	N	N	P	P	Pf	2800	1
Port-Bouet	2015-05-18	PB025	7	F	26	Vridi	N	N	P	P	Pf	1200	1
Port-Bouet	2015-05-18	PB029	5	F	16	PB	N	N	P	P	Pf	5200	0
Port-Bouet	2015-05-18	PB031	5	F	14	Marcory	N	N	P	P	Pf	3800	1
Port-Bouet	2015-05-28	PB033	25	F	66	Kmssi	N	N	P	P	Pf	1200	0
Port-Bouet	2015-06-03	PB036	4	M	11	Agboville	N	N	P	P	Pf	32000	1
Port-Bouet	2015-06-04	PB037	35	F	42	Bassam	N	N	P	P	Pf	12700	1
Port-Bouet	2015-06-15	PB049	10	F	24	PB	N	N	P	P	Pf	4800	1
Port-Bouet	2015-06-15	PB054	19	M	60	PB	N	N	P	P	Pf	4900	0
Port-Bouet	2015-06-16	PB055	6	M	21	Vridi	N	N	P	P	Pf	10200	1
Port-Bouet	2015-06-16	PB057	32	F	69	Gonzaqueville	N	N	P	P	Pf	4900	0
Port-Bouet	2015-06-16	PB059	44	F	74	PB	N	N	P	P	Pf	1200	0
Port-Bouet	2005-06-18	PB061	4	M	13	PB	N	N	P	P	Pf	35000	1
Port-Bouet	2005-06-18	PB062	25	F	55	Kmssi	N	N	P	P	Pf	12500	1
Port-Bouet	2005-06-18	PB066	8	F	26	PB	N	N	P	P	Pf	2600	1
Port-Bouet	2015-06-29	PB069	6	F	20	Adjouffou	N	N	P	P	Pf	18000	0
Port-Bouet	2015-06-29	PB070	3	F	11	Kmssi	N	N	P	P	Pf	5200	0
Port-Bouet	2015-06-29	PB072	14	F	69	PB	N	N	P	P	Pf	5300	1
Port-Bouet	2015-06-29	PB073	13	M	29	Petit Bassam	N	N	P	P	Pf	9300	0
	LEGEND
	ATCD = antecedent
	Prev = prévention (Traitement)
	TDR = Rapid Diagnostic Test
	GE = Thick drop
	FS = blood smear
	DP = Parasitaemia
	ANK = Andokoua Kouté
	PB = Port-Bouët
	AY = Ayamé

## Sheet: Anonkoua Kouté
	Site	Date	N°	Temperature	Age	Sexe	Poids	Quartier	ATCD	Prévention	TDR	GE	Frottis	DP	OD260/280
	Anonk	2015-02-12	ANK 005 Sg	38.1	9	F		Bocabo	N	N	P	P	Pf	90000
	Anonk	2015-02-12	ANK 005 U												1.17
	Anonk		anK 005 Sal												1.16
	Anonk		ANK 007 Sg	37.6	7	M	25	ANK	O	N	P	P	Pf	20000
	Anonk		ANK 007 U												1.53
	Anonk		ANK 007 Sal												1.33
	Anonk		ANK 010 Sg	39	11	F	31	PK18	N	N	P	P	Pf	76000
	Anonk		ANK 010 U												0.98
	Anonk		ANK 010 Sal												1.33
	Anonk		ANK 011 Sg	37.9	7	M	27	ANK	N	N	P	P	Pf	4500
	Anonk		ANK 011 U												1.54
	Anonk		ANK 011 Sal												1.52
	Anonk		ANK 013 Sg	40.3	7	M	28	Avocatier	N	O	P	P	Pf	20000
	Anonk		ANK 013 U												1.12
	Anonk		ANK 013 Sal												1.08
	Anonk		ANK 014 Sg	38.3	2	M	7	PK18	N	N	P	P	Pf	11000
	Anonk		ANK 014 U												1.87
	Anonk		ANK 014 Sal												1.72
	Anonk		ANK 023 Sg	39.2	11	F	31	ANK	N	N	P	P	Pf	2200
	Anonk		ANK 023 U												1.58
	Anonk		ANK 023 Sal												1.43
	Anonk		ANK 024 Sg	39.6				ANK	N	N	P	P	Pf	13000
	Anonk		ANK 024 U												1.45
	Anonk		ANK 024 Sal												1.25
	Anonk		ANK 026 Sg	37.9	5	F	16	Azaguié	N	N	P	P	Pf	20000
	Anonk		ANK 026 U												1.81
	Anonk		ANK 026 Sal												2.03
	Anonk		ANK 035 Sg	40.1	9	F	23	ANK	N	O	P	P	Pf	20000
	Anonk		ANK 035 U												1.33
	Anonk		ANK 035 Sal												1.31
	Anonk		ANK 036 Sg	36.8	14	F	31	Avocatier	O	O	P	P	Pf	4800
	Anonk		ANK 036 U												1.27
	Anonk		ANK 036 Sal												1.91
	Anonk		ANK 041 Sg	38.7	22	F		ANK	N	N	P	P	Pf	2800
	Anonk		ANK 041 U												1.07
	Anonk		ANK 041 Sal												1.4
	Anonk		ANK 043 Sg	37.6	6	M	18	PK18	N	N	P	P	Pf	40000
	Anonk		ANK 043 U												1.51
	Anonk		ANK 043 Sal												1.18
	Anonk		ANK 044 Sg	38.5	15	M	38	ANK	N	N	P	P	Pf	80000
	Anonk		ANK 044 U												2.17
	Anonk		ANK 044 Sal												1.46
	Anonk		ANK 047 Sg	38.2	13	F	33	Adjamé	O	N	P	P	Pf	20000
	Anonk		ANK 047 U												1.46
	Anonk		ANK 047 Sal												1.8
	Anonk		ANK 051 Sg	38.2	53	F	76	Ndotré	N	N	P	P	Pf	5300
	Anonk		ANK 051 U												0.97
	Anonk		ANK 051 Sal												1.44
	Anonk		ANK 056 Sg	37.7	45	F	76	Abobo Gare	N	N	P	P	Pf	2500
	Anonk		ANK 056 U												1.03
	Anonk		ANK O56 Sal												1.35
	Anonk	2015-03-02	ANK 057 Sg	38.4	7	M	32	ANK	N	O	P	P	Pf	6200
	Anonk		ANK 057 U												1.29
	Anonk		ANK 057 Sal												1.31
	Anonk		ANK 063 Sg	38.1	3	M	14	PK18	N	O	P	P	Pf	30000
	Anonk		ANK 063 U												1.15
	Anonk		ANK 063 Sal												1.48
	Anonk		ANK 064 Sg	37.8	3	F	13	PK18	N	O	P	P	Pf	45000
	Anonk		ANK 064 U												2.15
	Anonk		ANK 064 Sal												1.17
	Anonk		ANK 066 Sg	37.7	5	F	13	Abobo Gare	N	O	P	P	Pf	15000
	Anonk		ANK 066 U												1.53
	Anonk		ANK 066 Sal												1.42
	Anonk		ANK 070 Sg	37.7	44	F	83	Ndotré	N	N	P	P	Pf	8500
	Anonk		ANK 070 U												0.95
	Anonk		ANK 070 Sal												1.16
	Anonk		ANK 074 Sg	37.8	10	M	31	Anyama	N	N	P	P	Pf	4800
	Anonk		ANK 074 U												1.3
	Anonk		ANK 074 Sal												1.34
	Anonk	2015-03-10	ANK 075 Sg	38	34	F	57	ANK	N	N	P	P	Pf	6000
	Anonk		ANK 075 U												1.51
	Anonk		ANK 075 Sal												1.11
	Anonk		ANK 078 Sg	37.8	25	M	65	PK18	N	N	P	P	pf	4800
	Anonk		ANK 078 U												1.29
	Anonk		ANK 78 Sal												1.05
	Anonk	2015-03-16	ANK 080 Sg	39.6	20	F	66	ANK	N	N	P	P	Pf	24000
	Anonk		ANK 080 U												1.49
	Anonk		ANK 080 Sal												1.04
	Anonk		ANK 081 Sg	39.4	40	F	75	ANK	N	N	P	P	Pf	18000
	Anonk		ANK 081 U												0.95
	Anonk		ANK 081 Sal												1.48
	Anonk		ANK 084 Sg	38.6	13	F	31	ANK	N	N	P	P	Pf	19000
	Anonk		ANK 084 U												1.15
	Anonk		ANK 084 Sal												1.19
	Anonk		ANK 086 Sg	40	37	M	58	PK18	N	N	P	P	Pf	8600
	Anonk		ANK 086 U												2.04
	Anonk		ANK 086 Sal												1.16
	Anonk		ANK 093 Sg	38	8	F	26	Anyama	N	N	P	P	Pf	42000
	Anonk		ANK 093 U												1.12
	Anonk		ANK 093 Sal												1.31
	Anonk		ANK 102 Sg	39	13	M	35	Anador	N	N	P	P	Pf	50000
	Anonk		ANK 102 U												2.04
	Anonk		ANK 102 Sal												1.02

## Sheet: Port Bouët
	Date	N°	Température	age	sexe	poids	Quartier	ATCD	Prevention	TDR	GE	Frottis	DP	DO260/280
Port-Bouet		PB002 Sg	38	22	F	56	Kmssi	N	N	P	P	Pf	12800
Port-Bouet		PB002 U												1.47
Port-Bouet		PB002 Sal												1.06
Port-Bouet		PB004 Sg	37.8	18	F	47.5	Vridi	N	N	P	P	Pf	8900
Port-Bouet		PB004 U												1.98
Port-Bouet		PB004 Sal												1.05
Port-Bouet		PB006 Sg	38	4	F	18	PB	N	N	P	P	Pf	8400
Port-Bouet		PB006 U												1.48
Port-Bouet		PB006 Sal												1.02
Port-Bouet		PB009 Sg	37.6	5	F	14	PB	N	N	P	P	Pf	2100
Port-Bouet		PB009 U												0.93
Port-Bouet		PB009 sSal												0.33
Port-Bouet		PB012 Sg	39	27	F	66	PB	N	N	P	P	Pf	25800
Port-Bouet		PB012 U												1.89
Port-Bouet		PB012 Sal												1.4
Port-Bouet		PB015 Sg	37.8	33	M	69	Kmssi	N	N	P	P	Pf	35000
Port-Bouet		PB015 U												1.52
Port-Bouet		PB015 Sal												1.21
Port-Bouet		PB016 Sg	37.8	15	M	42	PB	N	N	P	P	Pf	6800
Port-Bouet		PB016 U												0.74
Port-Bouet		PB016 Sal												0.99
Port-Bouet	2015-05-01	PB017 Sg	40	29	F	65	PB	N	N	P	P	Pf	8200
Port-Bouet		PB017 U												1.22
Port-Bouet		PB017 Sal												1.26
Port-Bouet		PB019 Sg	39	7	M	19	Modeste	N	N	P	P	Pf	2100
Port-Bouet		PB019 U												1.3
Port-Bouet		PB019 Sal												1.19
Port-Bouet		PB020 Sg	38	18	M	55	PB	N	N	P	P	Pf	6800
Port-Bouet		PB020 U												0.79
Port-Bouet		PB020 Sal												1.03
Port-Bouet		PB021 Sg	38	7	M	22	Gonzaqueville	N	N	P	P	Pf	1200
Port-Bouet		PB021 U												1.85
Port-Bouet		PB021 Sal												1.15
Port-Bouet	2015-05-04	PB022 Sg	39.6	27	F	50	PB	N	N	P	P	Pf	2100
Port-Bouet		PB022 U												1.07
Port-Bouet		PB022 Sal												1.1
Port-Bouet	2015-05-11	PB023 Sg	38	54	F	75	PB	N	N	P	P	Pf	1200
Port-Bouet		PB023 U												1.1
Port-Bouet		PB023 Sal												0.98
Port-Bouet		PB024 Sg	40	3	M	11	PB	N	N	P	P	Pf	2800
Port-Bouet		PB024 U												0.97
Port-Bouet		PB024 Sal												0.99
Port-Bouet	2015-05-18	PB025 Sg	37.8	7	F	26	Vridi	N	N	P	P	Pf	1200
Port-Bouet		PB025 U												1.78
Port-Bouet		PB025 Sal												1.21
Port-Bouet		PB029 Sg	39	5	F	16	PB	N	N	P	P	Pf	5200
Port-Bouet		PB029 U												1.23
Port-Bouet		PB029 Sal												1.16
Port-Bouet		PB031 Sg	38	5	F	14	Marcory	N	N	P	P	Pf	3800
Port-Bouet		PB031 U												0.95
Port-Bouet		PB031 Sal												1.05
Port-Bouet	2015-05-28	PB033 Sg	37.7	25	F	66	Kmssi	N	N	P	P	Pf	1200
Port-Bouet		PB033 U												1.15
Port-Bouet		PB033 Sal												0.84
Port-Bouet	2015-06-03	PB036 Sg	38	4	M	11	Agboville	N	N	P	P	Pf	32000
Port-Bouet		PB036 U												0.96
Port-Bouet		PB036 Sal												1.06
Port-Bouet	2015-06-04	PB037 Sg	39	35	F	42	Bassam	N	N	P	P	Pf	12700
Port-Bouet		PB037 U												1.84
Port-Bouet		PB037 Sal												0.98
Port-Bouet	2015-06-15	PB049 Sg	40	10	F	24	PB	N	N	P	P	Pf	4800
Port-Bouet		PB049 U												1.14
Port-Bouet		PB049 Sal												1.12
Port-Bouet		PB054 Sg	37.8	19	M	60	PB	N	N	P	P	Pf	4900
Port-Bouet		PB054 U												1.79
Port-Bouet		PB054 Sal												1.09
Port-Bouet	2015-06-16	PB055 Sg	37.8	6	M	21	Vridi	N	N	P	P	Pf	10200
Port-Bouet		PB055 U												1.59
Port-Bouet		PB055 Sal												0.91
Port-Bouet		PB057 Sg	37.7	32	F	69	Gonzaqueville	N	N	P	P	Pf	4900
Port-Bouet		PB057 U												1.33
Port-Bouet		PB057 Sal												1.09
Port-Bouet		PB059 Sg	37.9	44	F	74	PB	N	N	P	P	Pf	1200
Port-Bouet		PB059 U												1.07
Port-Bouet		PB059 Sal												1.0
Port-Bouet	2005-06-18	PB061 Sg	38	4	M	13	PB	N	N	P	P	Pf	35000
Port-Bouet		PB061 U												1.77
Port-Bouet		PB061 Sal												1.12
Port-Bouet		PB062 Sg	39.2	25	F	55	Kmssi	N	N	P	P	Pf	12500
Port-Bouet		PB062 U												1.5
Port-Bouet		PB062 Sal												1.11
Port-Bouet		PB066 Sg	40	8	F	26	PB	N	N	P	P	Pf	2600
Port-Bouet		PB066 U												1.32
Port-Bouet		PB066 Sal												1.08
Port-Bouet	2015-06-29	PB069 Sg	39	6	F	20	Adjouffou	N	N	P	P	Pf	18000
Port-Bouet		PB069 U												1.63
Port-Bouet		PB069 Sal												1.1
Port-Bouet		PB070 Sg	40	3	F	11	Kmssi	N	N	P	P	Pf	5200
Port-Bouet		PB070 U												0.8
Port-Bouet		PB070 Sal												1.14
Port-Bouet		PB072 Sg	39	14	F	69	PB	N	N	P	P	Pf	5300
Port-Bouet		PB072 U												1.02
Port-Bouet		PB072 Sal												1.12
Port-Bouet		PB073 Sg	40	13	M	29	Petit Bassam	N	N	P	P	Pf	9300
Port-Bouet		PB073 U												1.93
Port-Bouet		PB073 Sal												1.17

## Sheet: Ayame
Sites	Date	N°	Température	age	sexe	poids	Quartier	ATCD	Prévention	TDR	GE	Frottis	DP	DO260/280
Ayame		AY003 Sg	37.6	20	F	66	Diby	Grossesse	N	P	P	Pf	5840
Ayame		AY003 U												1.06
Ayame		AY003 Sal												1.35
Ayame	2015-06-19	AY005 Sg	37.6	8	M	18	Kelesso	N	N	P	P	Pf	162000
Ayame		AY005 U												1.18
Ayame		AY005 Sal												1.27
Ayame	2015-06-22	AY006 Sg	39	21	F	58	Eboué	N	N	P	P	Pf	5000
Ayame		AY006 U												1.93
Ayame		AY006 Sal												0.72
Ayame		AY007 Sg	39.3	11	F	31	Ayamé	N	N	P	P	Pf	6830
Ayame		AY007 U												1.13
Ayame		AY007 Sal												1.04
Ayame		AY010 Sg	37.7	2	M	11	Bonoua	N	N	P	P	Pf	8480
Ayame		AY010 U												0.87
Ayame		AY010 Sal												1.32
Ayame	2015-06-25	AY011 Sg	37.8	25	F	93	Ayamé	N	N	P	P	Pf	11000
Ayame		AY011 U												0.88
Ayame		AY011 Sal												0.94
Ayame	2015-06-26	AY012 Sg	37.6	38	F	54	Akressi	Grossesse	N	P	P	Pf	35000
Ayame		AY012 U												1.18
Ayame		AY012 Sal												1.28
Ayame		AY013 Sg	37.9	2	M	13	Ayamé	N	N	P	P	Pf	20000
Ayame		AY013 U												2.17
Ayame		AY013 Sal												0.34
Ayame		AY014 Sg	38	44	M	70	Aboisso	N	N	P	P	Pf	28000
Ayame		AY014 U												1.01
Ayame		AY014 Sal												1.08
Ayame		AY015 Sg	38.1	12	F	31	Ayamé	N	N	P	P	Pf	10000
Ayame		AY015 U												1.13
Ayame		AY015 Sal												1.65
Ayame		AY017 Sg	39	15	F	48	Ayamé	N	N	P	P	Pf	2060
Ayame		AY017 U												1.29
Ayame		AY017 Sal												1.39
Ayame	2015-07-01	AY018 Sg	37.8	4	F	10	Ayamé	N	N	P	P	Pf	37000
Ayame		AY018 U												1.84
Ayame		AY018 Sal												1.26
Ayame		AY020 Sg	40	3	M	19.5	Ayamé	N	N	P	P	Pf	17310
Ayame		AY020 U												1.52
Ayame		AY020 Sal												0.85
Ayame		AY021 Sg	39	3	M	12	Ayamé	N	N	P	P	Pf	9045
Ayame		AY021 U												0.80
Ayame		AY021 Sal												1.01
Ayame		AY022 Sg	38.6	9	M	26.5	Ayamé	N	N	P	P	Pf	18992
Ayame		AY022 U												1.07
Ayame		AY022 Sal												1.03
Ayame	2015-07-02	AY024 Sg	37.9	5	F	18	Appouasso	N	N	P	P	Pf	> 200000
Ayame		AY024 U												0.91
Ayame		AY024 Sal												1.39
Ayame		AY025 Sg	37.6	45	M	80	Aboisso	N	N	P	P	Pf	2500
Ayame		AY025 U												1.57
Ayame		AY025 Sal												1.05
Ayame		AY027 Sg	39.8	3	M	10	Amoakro	N	N	P	P	Pf	2330
Ayame		AY027 U												1.28
Ayame		AY025 Sal												0.82
Ayame		AY028 Sg	37.8	55	F	64	Ayamé	N	N	P	P	Pf	2060
Ayame		AY028 U												0.82
Ayame		AY028 Sal												2.44
Ayame	2015-07-06	AY029 Sg	39.5	2	M	12	Assouba	N	N	P	P	Pf	15000
Ayame		AY029 U												0.87
Ayame		AY029 Sal												0.90
Ayame	2015-07-07	AY030 Sg	39	9	F	21	Ayebo	N	N	P	P	Pf	> 200000
Ayame		AY030 U												1.35
Ayame		AY030 Sal												0.27
Ayame		AY031 Sg	37.9	33	F	66	Ayamé	N	N	P	P	Pf	7327
Ayame		AY031 U												1.17
Ayame		AY031 Sal												1.01
Ayame	2015-07-08	AY033 Sg	38	10	F	22	Ayamé	N	N	P	P	Pf	123000
Ayame		AY033 U												0.98
Ayame		AY033 Sal												1.03
Ayame		AY034 Sg	38	6	F	18	Ayamé	N	N	P	P	Pf	116000
Ayame		AY034 U												1.25
Ayame		AY034 Sal												0.98
Ayame	2015-07-15	AY035 Sg	37.8	39	F	66	Ayamé	N	N	P	P	Pf	32450
Ayame		AY035 U												1.69
Ayame		AY035 Sal												1.43
Ayame	2015-07-20	AY036 Sg	39	12	F	22	Ayamé	N	N	P	P	Pf	120000
Ayame		AY036 U												1.01
Ayame		AY036 Sal												1.07
Ayame		AY042 Sg	39	20	F	53	Ayamé	N	N	P	P	Pf	68000
Ayame		AY042 U												0.85
Ayame		AY042 Sal												0.66
Ayame		AY044 Sg	37.8	3	F	15	Ayamé	N	N	P	P	Pf	15000
Ayame		AY044 U												0.73
Ayame		AY044 Sal												0.90
Ayame		AY046 Sg	37.8	7	M	22	Ayamé	N	N	P	P	Pf	10000
Ayame		AY046 U												0.81
Ayame		AY046 Sal												0.87
Ayame		AY047 Sg	39	7	M	21	Akakro	N	N	P	P	Pf	20000
Ayame		AY047 U												1.11
Ayame		AY047 Sal												0.97
Ayame		AY048 Sg	38	18	F	55	Ayamé	N	N	P	P	Pf	1642
Ayame		AY048 U												1.75
														0.68
